# Supplementary material for: Label-free quantitative proteomic analysis reveals dysfunction of complement pathway in peripheral blood of schizophrenia patients: evidence for the immune hypothesis of schizophrenia
Source: Royal Society of Chemistry journal article supplement (doi:10.1039/c2mb25158b), 2012-06-13

**Supplementary Fig.1** The reproductive analysis of the LC-MS/MS runs. Three replicate LC-MS/MS analyses were performed for each sample. Each spot represents a protein pairwise with its relative abundance in the sample from two experiments shown on the x-axis and the y-axis, respectively.

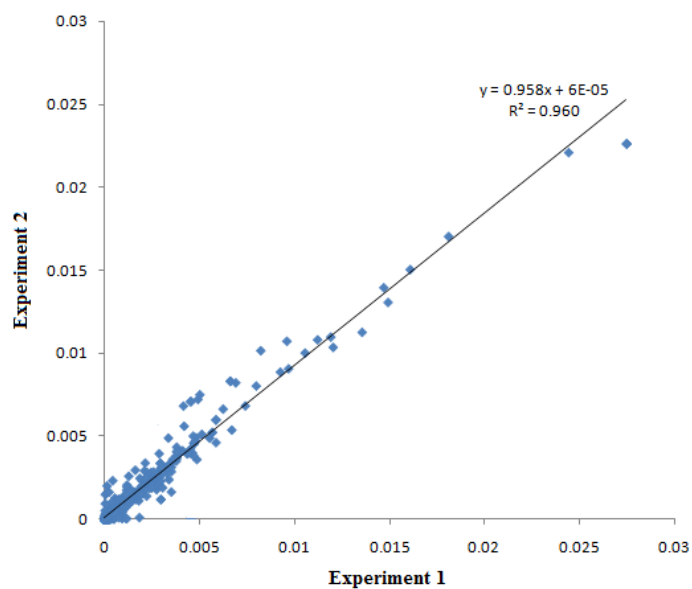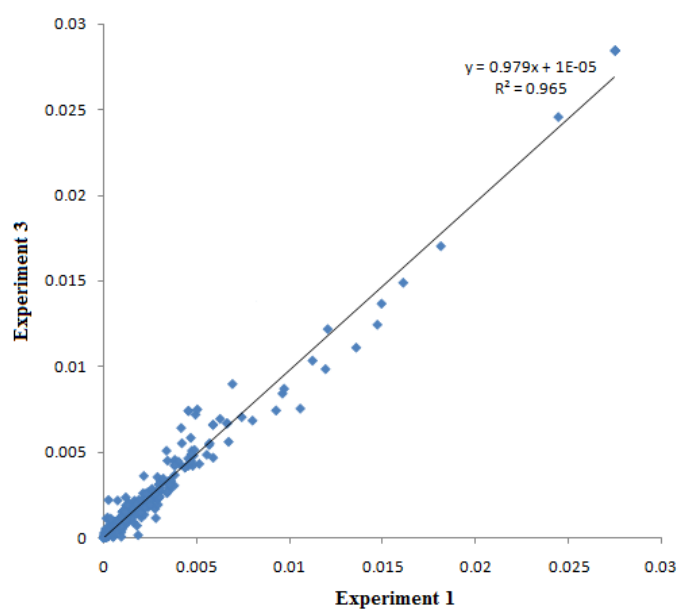

**Supplementary Fig.2** Box-whisker plots or scatter plot for the activity of three complement pathway.

(a, b) For the activity of CP and AP, the data show normal distribution. Box-and-whisker plots clearly show the distributions of data points by five-number summaries (1 minimum, 2 maximum, 3 median, 4 lower quartile, and 5 upper quartile). (c) For the activity of MBLP, the data don't show normal distribution. Scatter plot displays all the data points.

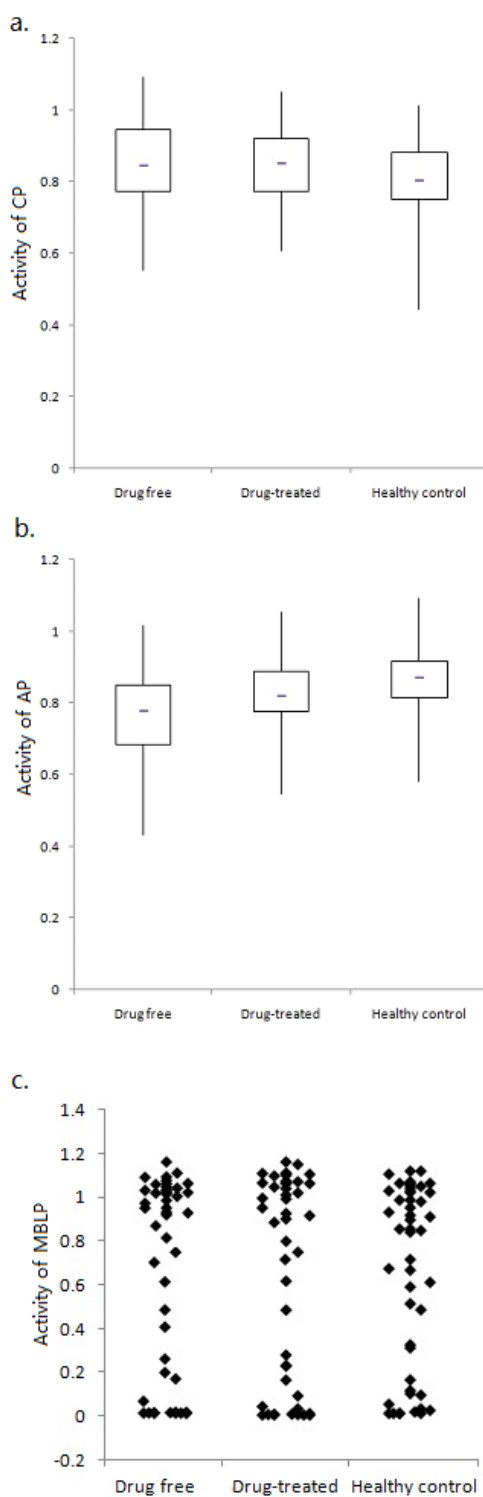

Supplement: c2mb25158b.pdf [file c2mb25158b.pdf]
